# Supplementary material
Source: PubMed Central journal article supplement (PMC3060403)
Supplement: NIHMS274629-supplement-Supplemental_data.pdf [file NIHMS274629-supplement-Supplemental_data.pdf]

**Morphogenesis and maintenance of the 3D-thymic medulla and prevention of nude skin phenotype require FoxN1 in pre- and post-natal K14 epithelium**

Jianfei Guo, Moshiur Rahman, Lili Cheng, Shangmin Zhang, Amy Tvinnereim, and Dong-Ming Su

Department of Molecular Biology and Immunology, University of North Texas Health Science Center at Fort Worth, Fort Worth, TX, 76107, USA

**Supplemental Data (FiguresS1 – S4 and Table S1 – S2)**

% fx/fx offspring with/without K14Cre and phenotype

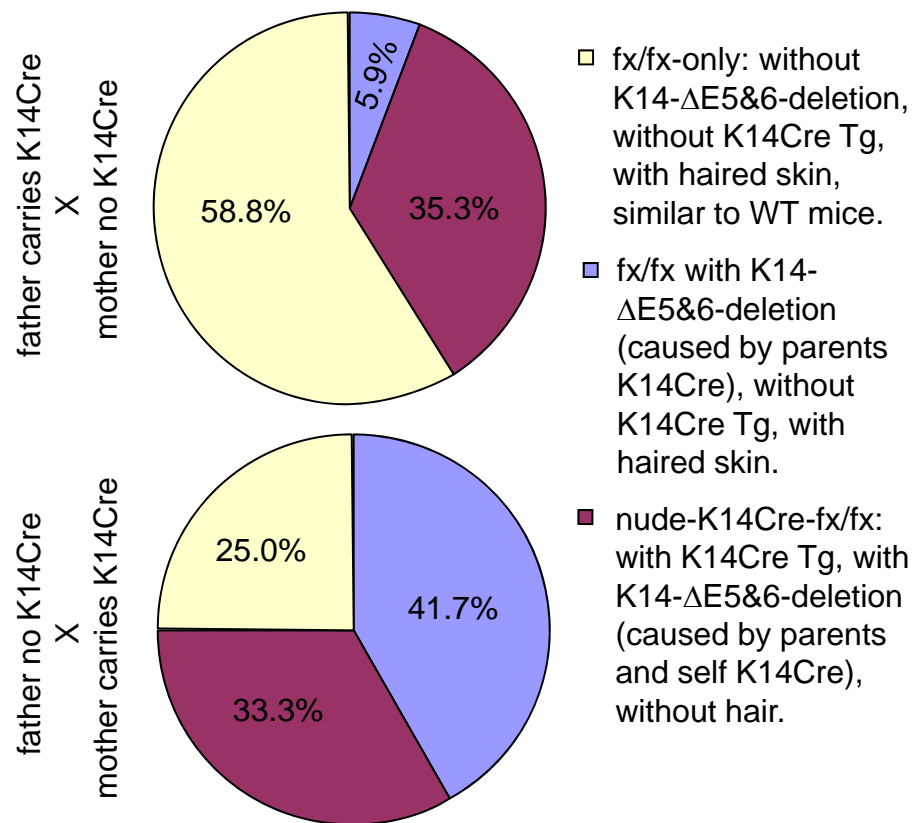

**Supplemental Figure S1. Haired/nude K14Cre-fx/fx mice derived from alternate mating strategies.**

Top panel shows fx/fx homozygous offspring from K14Cre-carrying male crossing with non-K14Cre-carrying female mice. Bottom panel shows fx/fx homozygous offspring from non-K14Cre-carrying male crossing with K14Cre-carrying female mice.

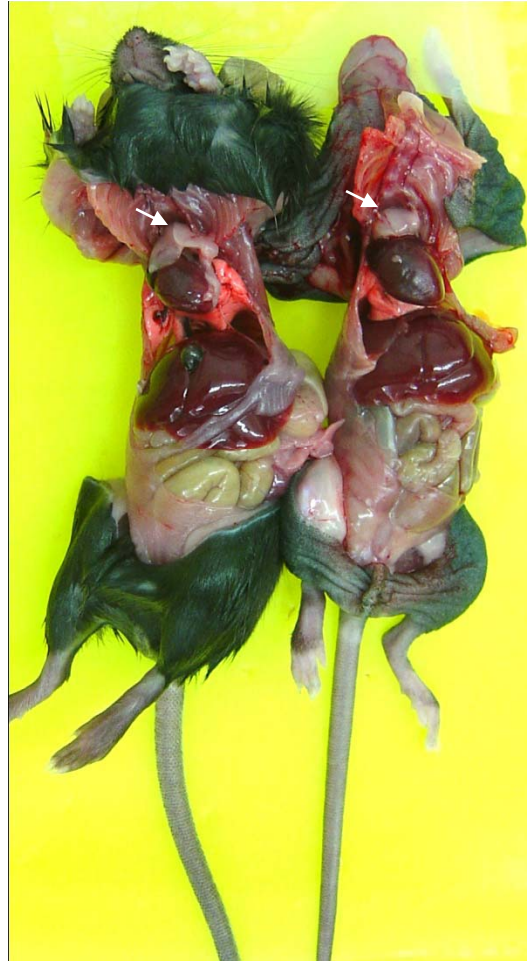

**Supplemental Figure S2. An un-cropped image of the mice in Fig. 2A.**

Left mouse shows the K14Cre-fx/+ thymus (arrow) and haired skin; right mouse shows the nude-K14Cre-fx/fx thymus (arrow) and nude skin.

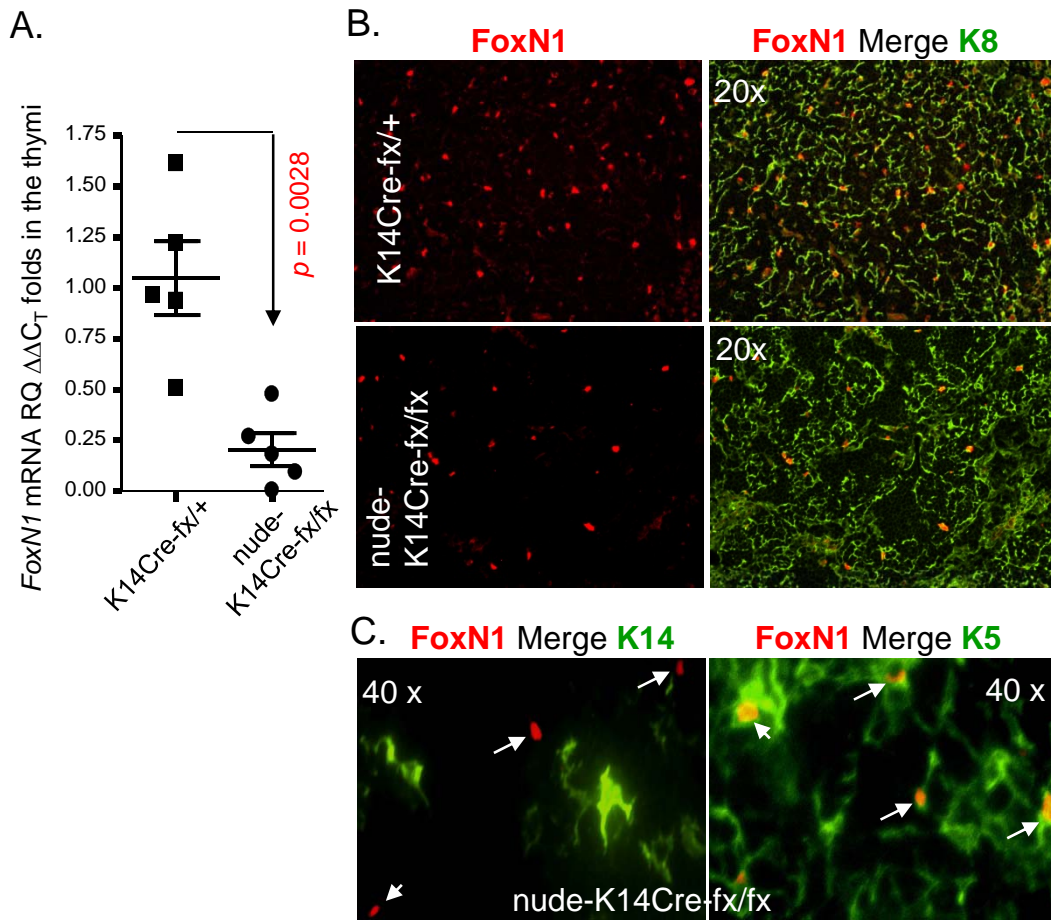

**Supplemental Figure S3. FoxN1 expression in the thymi of heterozygous (K14Cre-fx/+) and nude homozygous (K14Cre-fx/fx) mice.**

**(A)** A summarized real-time RT-PCR result of FoxN1 mRNA levels in the thymi of K14Cre-fx/+ (squares) and nude-K14Cre-fx/fx (circles) mice. Each square and circle represents data from one animal. **(B)** Immunofluorescent staining image of the thymi from K14Cre-fx/+ (top panels) and nude-K14Cre-fx/fx (bottom panels) mice using antibodies against keratin-8 (green) and FoxN1 (red, left panels – antibody from Dr. Amagai). A representative result is shown of two experiments, with essentially identical results. The right panels show merged images. **(C)** Immunofluorescent staining image of the thymi from nude-K14Cre-fx/fx mice using antibodies against FoxN1 (red – antibody from Santa Cruz, clone G20) vs. k14 (green, left panels) or vs. K5 (green, right panel). Arrows show FoxN1 without co-localization to K14<sup>+</sup> epithelial cells, but with co-localization to K5<sup>+</sup> epithelial cells.

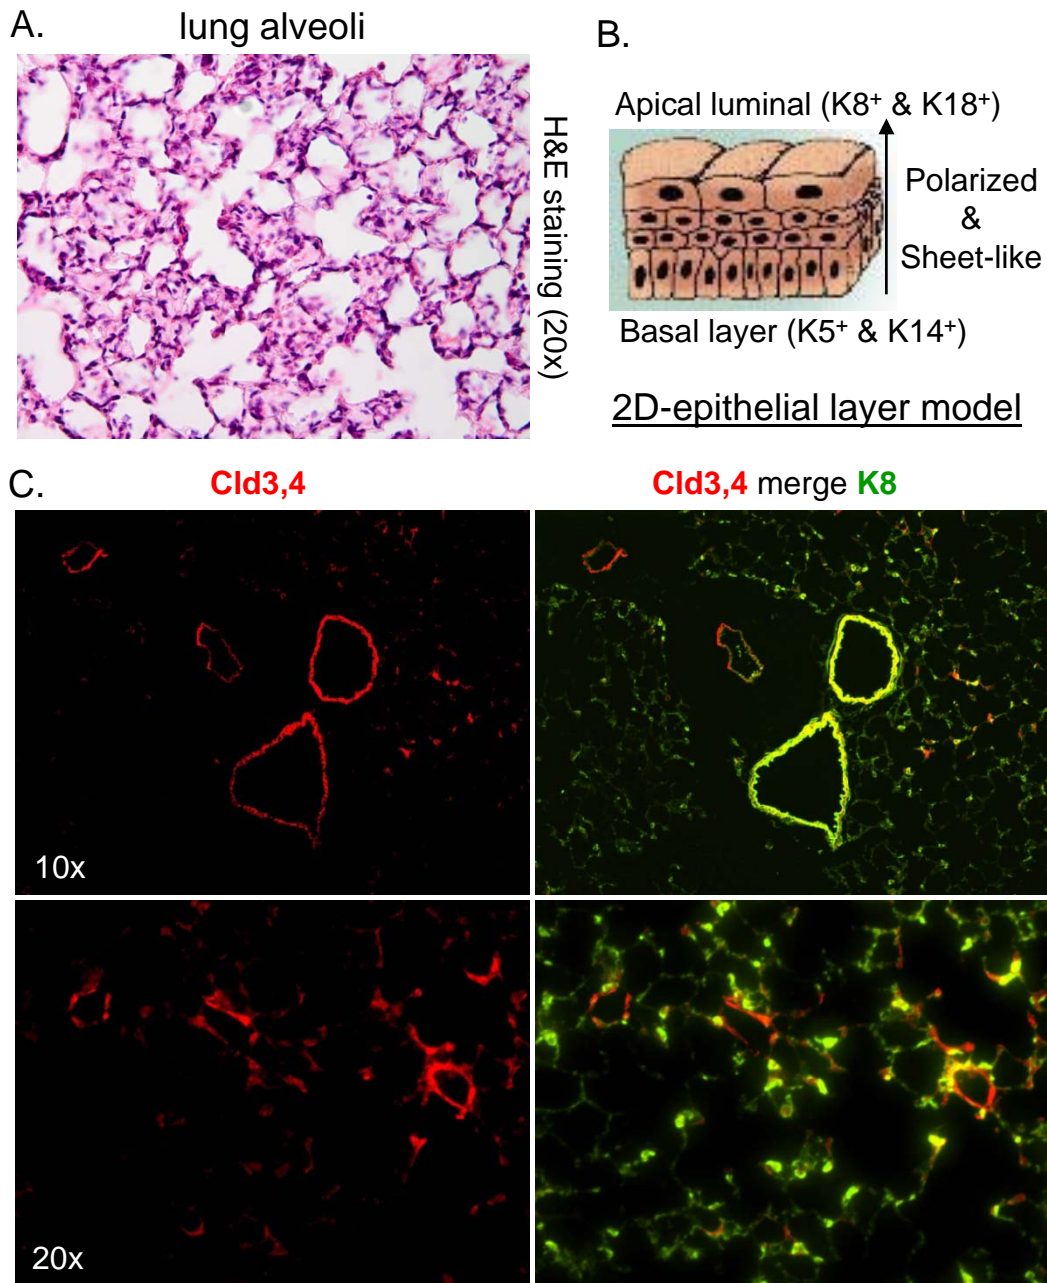

**Supplemental Figure S4. Micro-structure of lung tissue.**

- (A) H&E staining of the mouse lung showing normal lung alveoli.
- (B) Model of 2D-epithelial layer in the skin and lung airway, but not in the normal thymus (adopted from Wikipedia encyclopedia).
- (C) Immunofluorescent staining showing Cld3,4 expression in 2D airway epithelium: top panels show Cld3,4 expression in large bronchiole, bottom panels show Cld3,4 expression in small alveolar ducts and/or alveoli.

Jianfei Gu, Moshir Rahma, Lili Cheng, Shangmin Zhang, Amy Tvinnereim,  
and Dong-Ming Su

**Supplemental Table S1. PCR primers for mouse genotyping and semi-quantitative RT-PCR**

| PCR for                                                  | Primer Sequence:                                     |
|----------------------------------------------------------|------------------------------------------------------|
| loxP-floxed <i>FoxN1</i><br>genotyping<br>(fx PCR)       | Primer-A: 5'- <b>cca acc tcc tgg gga cat ga</b> -3'  |
|                                                          | Primer-B: 5'- <b>tag gag gag ggg agc gcc ta</b> -3'  |
|                                                          | Primer-C: 5'- <b>gtg ggc ttt tca cca tcc ta</b> -3'  |
| K14Cre transgene<br>and<br>Internal Control              | Transgene 5'- GCG GTC TGG CAG TAA AAA CTA TC-3'      |
|                                                          | Transgene 5'- GTG AAA CAG CAT TGC TGT CAC TT -3'     |
|                                                          | Internal Ctr 5'-CTA GGC CAC AGA ATT GAA AGA TCT-3'   |
|                                                          | Internal Ctr 5'-GTA GGT GGA AAT TCT AGC ATC ATC C-3' |
| Semi-quantitative RT-<br>PCR for Aire mRNA               | 5'- GGG ACT GGT TTA GGT CCA CA-3'                    |
|                                                          | 5'- AGG TGG GGA TGG AAT GCT AC-3'                    |
| FoxN1 real-time RT-<br>PCR primers and probe<br>(TaqMan) | 5'-primer: 5'-GGC CAA CGC CGA AGG-3'                 |
|                                                          | 3'-primer: 5'-TGA AGA TGA GGA TGC TGT AAG AGT AGA-3' |
|                                                          | Probe: 6FAM-CAC CAG CCA CTC TTC CCA AAG CCC-TAMRA    |

**Note: fx PCR was also used for measuring the excision of FoxN1  $\Delta E5&6$  mediated by K14Cre Tg:** The % excision was calculated as the band density ratio of the signal from the excised band / (excised band + fx band) in K14Cre-fx/fx homozygous mice, or the excised band /1/2 (excised band + fx and WT band) in K14Cre-fx/+ heterozygous mice (ref. Fig. 1C top panel).



Jianfei Gu, Moshiur Rahma, Lili Cheng, Shangmin Zhang, Amy Tvinnereim,  
and Dong-Ming Su

**Supplemental Table S2. Similarities and differences in the roles of FoxN1 in the skin and thymus**

| Functions                                                        | In the skin                                                         | In the thymus                                                                                         | References                       |
|------------------------------------------------------------------|---------------------------------------------------------------------|-------------------------------------------------------------------------------------------------------|----------------------------------|
| Epithelial differentiation                                       | Yes                                                                 | Yes                                                                                                   | (1,2)                            |
| Primary role in fetal organogenesis                              | Mainly in hair follicle cortex                                      | In both cortex and medulla                                                                            | (3-5)                            |
| Primary role in postnatal life                                   | Mainly in hair follicle cortex                                      | Mainly in the medulla                                                                                 | (3,4,6)                          |
| Formation and maintenance of epithelial 3D structure             | N/A                                                                 | Yes                                                                                                   | Novel finding in this manuscript |
| Determination of pigmentation pattern                            | Yes                                                                 | N/A                                                                                                   | (4)                              |
| Cell types affected by knockout of FoxN1 in K14 epithelial cells | Skin stem cells (causes nude phenotype, similar to FoxN1-null mice) | A subset of TEC stem cells and postnatal mTECs (hypomorphic mutation, different from FoxN1-null mice) | Novel finding in this manuscript |

**References:**

1. Mecklenburg, L., Tychsen, B., and Paus, R. (2005) *Exp Dermatol* **14**, 797-810
2. Nehls, M., Kyewski, B., Messerle, M., Waldschutz, R., Schuddekopf, K., Smith, A. J., and Boehm, T. (1996) *Science* **272**, 886-889
3. Lee, D., Prowse, D. M., and Brissette, J. L. (1999) *Dev Biol* **208**, 362-374
4. Weiner, L., Han, R., Scicchitano, B. M., Li, J., Hasegawa, K., Grossi, M., Lee, D., and Brissette, J. L. (2007) *Cell* **130**, 932-942
5. Shakib, S., Desanti, G. E., Jenkinson, W. E., Parnell, S. M., Jenkinson, E. J., and Anderson, G. (2009) *J Immunol* **182**, 130-137
6. Cheng, L., Guo, J., Sun, L., Fu, J., Barnes, P. F., Metzger, D., Chambon, P., Oshima, R. G., Amagai, T., and Su, D. M. (2010) *J Biol Chem* **285**, 5836-5847
